# Supplementary material for: Coarse-Grained Molecular Simulation of Epidermal Growth Factor Receptor Protein Tyrosine Kinase Multi-Site Self-Phosphorylation
Source: PubMed Central journal article supplement (PMC3894164; doi:10.1371/journal.pcbi.1003435), 2014-01-16
Supplement: pcbi.1003435.s006.pdf [file pcbi.1003435.s006.pdf]

## Supporting Information

### Text S1.

#### Interpretation of simulated P-site binding event frequencies

The frequencies of catalytic site binding for the various P-sites occurring in our coarse-grained molecular simulations (see Figs. 4 and 9) should be related to the levels of P-site phosphorylation that would be seen in biochemical assays of receptor self-phosphorylation. Considering a proposed rapid equilibrium model of EGFR catalysis [60] in which the phospho-transfer reaction is preceded by the reversible binding of the peptide substrate to the ATP-occupied catalytic site (as would be predicted in the presence of saturating ATP concentrations), the observed frequency of binding for a given P-site  $i$  ( $i = 1-16$ , indicating each of the eight P-sites of the two molecules in the EGFR dimer) as simulated in this study would reflect the relative rate of the P-site-catalytic site association reaction ( $k'_{1,i}$ ) (with ' indicating this is not a second-order rate constant but first-order as would characterize an intramolecular reaction). The relative initial velocity of phosphorylation of P-site  $i$  ( $v_{\text{phos},i}$ ) as determined biochemically would be estimated by multiplying these frequencies by the rate constant  $k_{\text{cat},i}$  for the phospho-transfer reaction and dividing by the off-rate  $k_{-1,i}$  for the P-site-catalytic site binding event (values presumably different for each P-site):

$$v_{\text{phos},i} = k'_{1,i} \cdot k_{\text{cat},i} / k_{-1,i} \quad (1)$$

We note that there is a closely related expression (assuming again rapid equilibrium) for the catalytic efficiencies for P-site-derived synthetic peptide phosphorylation by the EGFR, such as seen in the steady state kinetics experiments of Fan *et al.* [8] (see Table 1):

$$k_{\text{cat},i} / K_{M,i} = k_{1,i} \cdot k_{\text{cat},i} / k_{-1,i} \quad (2)$$

except that the constants  $k_{1,i}$ , instead of containing information about the constrained diffusion of P-sites in an *intramolecular* association reaction as do the  $k'_{1,i}$  values above, characterize the second-order catalytic site association reaction for the P-site-derived synthetic peptides.

Combining these expressions 1 and 2 yields:

$$v_{\text{phos},i} = \left( k'_{1,i} / k_{1,i} \right) \cdot \left( k_{\text{cat},i} / K_{M,i} \right) \quad (3)$$

We might assume the  $k'_{1,i}$  values for the self-phosphorylation reaction contain information about the relative rates of *intramolecular* diffusional encounters for the individual P-sites ( $k'_{\text{intra},i}$ ) and information about the physical interaction of the individual P-sites with the active site (electrostatic attraction/repulsion, steric effects, etc.) ( $f_{\text{phys},i}$ ) such that

$$k'_{1,i} = f_{\text{phys},i} \cdot k'_{\text{intra},i} \quad (4)$$

(This is akin to a using modified Smoluchowski equation to treat diffusional and steric factors for an enzyme substrate association reaction, cf. [61].) Similarly, the  $k_{1,i}$  values for the synthetic peptide phosphorylation experiments could be assumed to depend upon the rate of *intermolecular* diffusional encounters ( $k_{\text{inter},i}$ ) and the same physical information ( $f_{\text{phys},i}$ ) or

$$k_{1,i} = f_{\text{phys},i} \cdot k_{\text{inter},i} \quad (5)$$

Then it would follow, by taking the ratio of 4 and 5, that

$$k'_{1,i} / k_{1,i} = k'_{\text{intra},i} / k_{\text{inter},i} \quad (6)$$

and, by combining 3 and 6,

$$v_{\text{phos},i} = \left( k'_{\text{intra},i} / k_{\text{inter},i} \right) \cdot \left( k_{\text{cat},i} / K_{M,i} \right) \quad (7)$$

If our simulations approximate the relative rates of *intramolecular* diffusional encounters for the individual P-sites ( $k'_{\text{intra},i}$ ) in the absence of physical factors (electrostatic and steric interactions), as would our course-grained simulations performed in absence of CT domain charges (see Fig. 9), and if the rates of *intermolecular* diffusion  $k_{\text{inter},i}$  in the absence of physical factors are equivalent for synthetic peptides of the same size, then the *relative* rates of P-site self-phosphorylation would be obey the proportionality

$$v_{\text{phos},i} \propto k'_{\text{intra},i} \cdot \left( k_{\text{cat},i} / K_{M,i} \right) \quad (8)$$

This is to say that the *relative* rates of P-site self-phosphorylation in biochemical experiments should be predicted by multiplying the catalytic efficiencies observed in peptide phosphorylation experiments by the relative frequencies of P-site binding seen in our simulations. Predicted relative rates of P-site self-phosphorylation ( $v_{\text{phos}}$ ) were thus obtained using the results from simulations with no CT domain charges (Fig. 9, totals of *cis* and *trans* binding events) and the catalytic constants of Fan *et al.* [8], and are presented in Table 1.
