# Supplementary material for: Coarse-Grained Molecular Simulation of Epidermal Growth Factor Receptor Protein Tyrosine Kinase Multi-Site Self-Phosphorylation
Source: PLOS journal article supplement (doi:10.1371/journal.pcbi.1003435), 2014-01-16
Supplement: S6 (10.1371/journal.pcbi.1003435.s006) [file journal.pcbi.1003435.s006]

301 Moved Permanently

# Moved Permanently

The document has moved here.

---

Apache Server at www.ploscompbiol.org Port 80
